# Supplementary material for: Functional and evolutionary analyses of the miR156 and miR529 families in land plants
Source: PubMed Central journal article supplement (PMC4739381; doi:10.1186/s12870-016-0716-5), 2016-02-03
Supplement: 12870_2016_716_MOESM1_ESM.pdf [file 12870_2016_716_MOESM1_ESM.pdf]

**Additional file 1. Predicted *SBP/SPL* targets from eudicot, monocot, and bryophyte species that contain miR156/529-responsive element.**

| Family/Class                   | SBP/SPL <sup>a</sup> | ID                | Position | No. Mismatches <sup>b</sup> | Target Sequence (5'-3') <sup>c</sup> |
|--------------------------------|----------------------|-------------------|----------|-----------------------------|--------------------------------------|
| <i>Brassicaceae</i> /Eudicot   | <i>AtSPL15</i>       | At3g57920         | CDS      | 1                           | <u>AAGCUGUGCUCUCUCUCUUCUGUCA</u>     |
|                                | <i>AtSPL9</i>        | At2g42200         | CDS      | 1                           | <u>AAACUGUGCUCUCUCUCUUCUGUCA</u>     |
|                                | <i>AISPL15</i>       | ARALYDRAFT_486243 | CDS      | 1                           | <u>AAGCUGUGCUCUCUCUCUUCUGUCA</u>     |
|                                | <i>ThSPL</i>         | AK353538          | CDS      | 2                           | <u>AAACUGUGCUCUCUCUCUUCUGUCA</u>     |
| <i>Vitaceae</i> /Eudicot       | <i>VvSPL9</i>        | NM_001280969.1    | CDS      | 1                           | <u>AAGCUGUGCUCUCUCUCUUCUGUCA</u>     |
| <i>Solanaceae</i> /Eudicot     | <i>SISBP15</i>       | Solyc10g078700    | CDS      | 1                           | <u>AAGUGGUGCUCUCUCUCUUCUGUCA</u>     |
|                                | <i>SISBP6a</i>       | Solyc03g114850    | CDS      | 3                           | <u>CAGCAAUGCUCUCUCUCUUCUGUCA</u>     |
|                                | <i>SISBP6c</i>       | Solyc12g038520    | CDS      | 1                           | <u>UGGCUGUGCUCUCUCUCUUCUGUCA</u>     |
| <i>Rosaceae</i> /Eudicot       | <i>MdSPL1</i>        | HM122684          | CDS      | 1                           | <u>AAGCUGUGCUCUCUCUCUUCUGUCA</u>     |
|                                | <i>FaSPL9</i>        | JN979457          | CDS      | 3                           | <u>GAGUUGUGCUCUCUCUCUUCUGUCA</u>     |
| <i>Salicaceae</i> /Eudicot     | <i>PtSPL1</i>        | POPTR_0016s04890g | CDS      | 2                           | <u>GAGCUGUGCUCUCUCUCUUCUGUCA</u>     |
|                                | <i>PtSPL2</i>        | POPTR_0010s16400g | CDS      | 2                           | <u>UAGCUGUGCUCUCUCUCUUCUGUCA</u>     |
| <i>Fabaceae</i> /Eudicot       | <i>GmSPL9</i>        | LOC100789301      | CDS      | 2                           | <u>AAACUGUGCUCUCUCUCUUCUGUCA</u>     |
|                                | <i>MtSPL</i>         | MTR_7g092930      | CDS      | 2                           | <u>AAACUGUGCUCUCUCUCUUCUGUCA</u>     |
| <i>Rutaceae</i> /Eudicot       | <i>PontSPL9</i>      | FJ502237          | CDS      | 2                           | <u>AAACUGUGCUCUCUCUCUUCUGUCA</u>     |
| <i>Plantaginaceae</i> /Eudicot | <i>AmSPL4</i>        | AJ011622          | CDS      | 3                           | <u>CAGCGGUGCUCUCUCUCUUCUGUCA</u>     |
| <i>Euphorbiaceae</i> /Eudicot  | <i>RcLIGULELESS1</i> | XM_002532297      | CDS      | 3                           | <u>AUCCUGUGCUCUCUCUCUUCUGUCA</u>     |
|                                | <i>RcSPL</i>         | XM_002512008      | CDS      | 3                           | <u>CAGUUGUGCUCUCUCUCUUCUGUCA</u>     |

**Additional Table 1. Continued**

| Family/Class                  | <i>SBP/SPL</i><br>gene | ID                   | Position | No.<br>Mismatches | Target Sequence (5'-3')          |
|-------------------------------|------------------------|----------------------|----------|-------------------|----------------------------------|
| <i>Panicoideae</i> /Monocot   | <i>ZmSBP1</i>          | GRMZM2G126018        | CDS      | 2                 | <u>CAGCUGUGCUCUCUCUCUUCUGUCA</u> |
|                               | <i>ZmSBP5</i>          | GRMZM2G061734        | CDS      | 2                 | <u>GGAUUGUGCUCUCUCUCUUCUGUCA</u> |
|                               | <i>TSH4</i>            | GRMZM2G307588        | CDS      | 2                 | <u>CAGCUGUGCUCUCUCUCUUCUGUCA</u> |
|                               | <i>ZmSBP7</i>          | GRMZM2G460544        | CDS      | 2                 | <u>CAGCUGUGCUCUCUCUCUUCUGUCA</u> |
|                               | <i>SbSPL2</i>          | SORBIDRAFT_03g044160 | CDS      | 3                 | <u>CAACUGUGCUCUCUCUCUUCUGUCA</u> |
|                               | <i>SbSPL5</i>          | SORBIDRAFT_07g027740 | CDS      | 3                 | <u>UAGCUGUGCUCUCUCUCUUCUGUCA</u> |
| <i>Ehrhartoideae</i> /Monocot | <i>OsSPL2</i>          | LOC_Os01g69830       | CDS      | 3                 | <u>CAACUGUGCUCUCUCUCUUCUGUCA</u> |
|                               | <i>OsSPL14</i>         | LOC_Os08g39890       | CDS      | 2                 | <u>AAGCUGUGCUCUCUCUCUUCUGUCA</u> |
|                               | <i>OsSPL17</i>         | LOC_Os09g31438       | CDS      | 2                 | <u>CAGCUGUGCUCUCUCUCUUCUGUCA</u> |
| <i>Pooideae</i> /Monocot      | <i>BdSPL14</i>         | LOC100836973         | CDS      | 2                 | <u>CAGCUGUGCUCUCUCUCUUCUGUCA</u> |
|                               | <i>BdSPL17</i>         | LOC100824643         | CDS      | 2                 | <u>CAGCUGUGCUCUCUCUCUUCUGUCA</u> |
| <i>Funariaceae</i> /Bryophyta | <i>PpSPL3</i>          | Pp1s194_53V6         | CDS      | 2                 | <u>UGGCCGUGCUCUCUCUCUUCUGUCA</u> |
|                               | <i>PpSPL6</i>          | Pp1s50_125V6         | CDS      | 2                 | <u>UGGUCGUGCUCUCUCUCUUCUGUCA</u> |
|                               | <i>PpSPL13</i>         | Pp1s194_57V6         | CDS      | 2                 | <u>UGGCCGUGCUCUCUCUCUUCUGUCA</u> |

<sup>a</sup>miR156/529 site-containing *SBP/SPL* genes identified in each species. *At*, *Arabidopsis thaliana*; *Al*, *Arabidopsis lyrata*; *Th*, *Thellungiella halophila*; *Vv*, *Vitis vinifera*; *Sl*, *Solanum lycopersium*; *Md*, *Malus domestica*; *Fa*, *Fragaria ananassa*; *Pt*, *Populus trichocarpa*; *Gm*, *Glycine max*; *Mt*, *Medicago truncatula*; *Pon*, *Poncirus trifoliata*; *Am*, *Antirrhinum majus*; *Rc*, *Ricinus communis*; *Zm*, *Zea mays*; *Os*, *Oryza sativa*; *Bd*, *Brachypodium distachyon*; *Aqc*, *Aquilegia caerulea*; *Pp*, *Physcomitrella patens*.

<sup>b</sup>Number of mismatches between miR529 and targets.

<sup>c</sup>Target sequences containing response elements for both miR156 and miR529. The first five underlined nucleotide acids indicate target sequence for miR529 and the last four show target sequence for miR156. The **bold** segment indicates the overlapped target sequence for miR156 and miR529.
