# Supplementary material for: Functional and evolutionary analyses of the miR156 and miR529 families in land plants
Source: PubMed Central journal article supplement (PMC4739381; doi:10.1186/s12870-016-0716-5), 2016-02-03

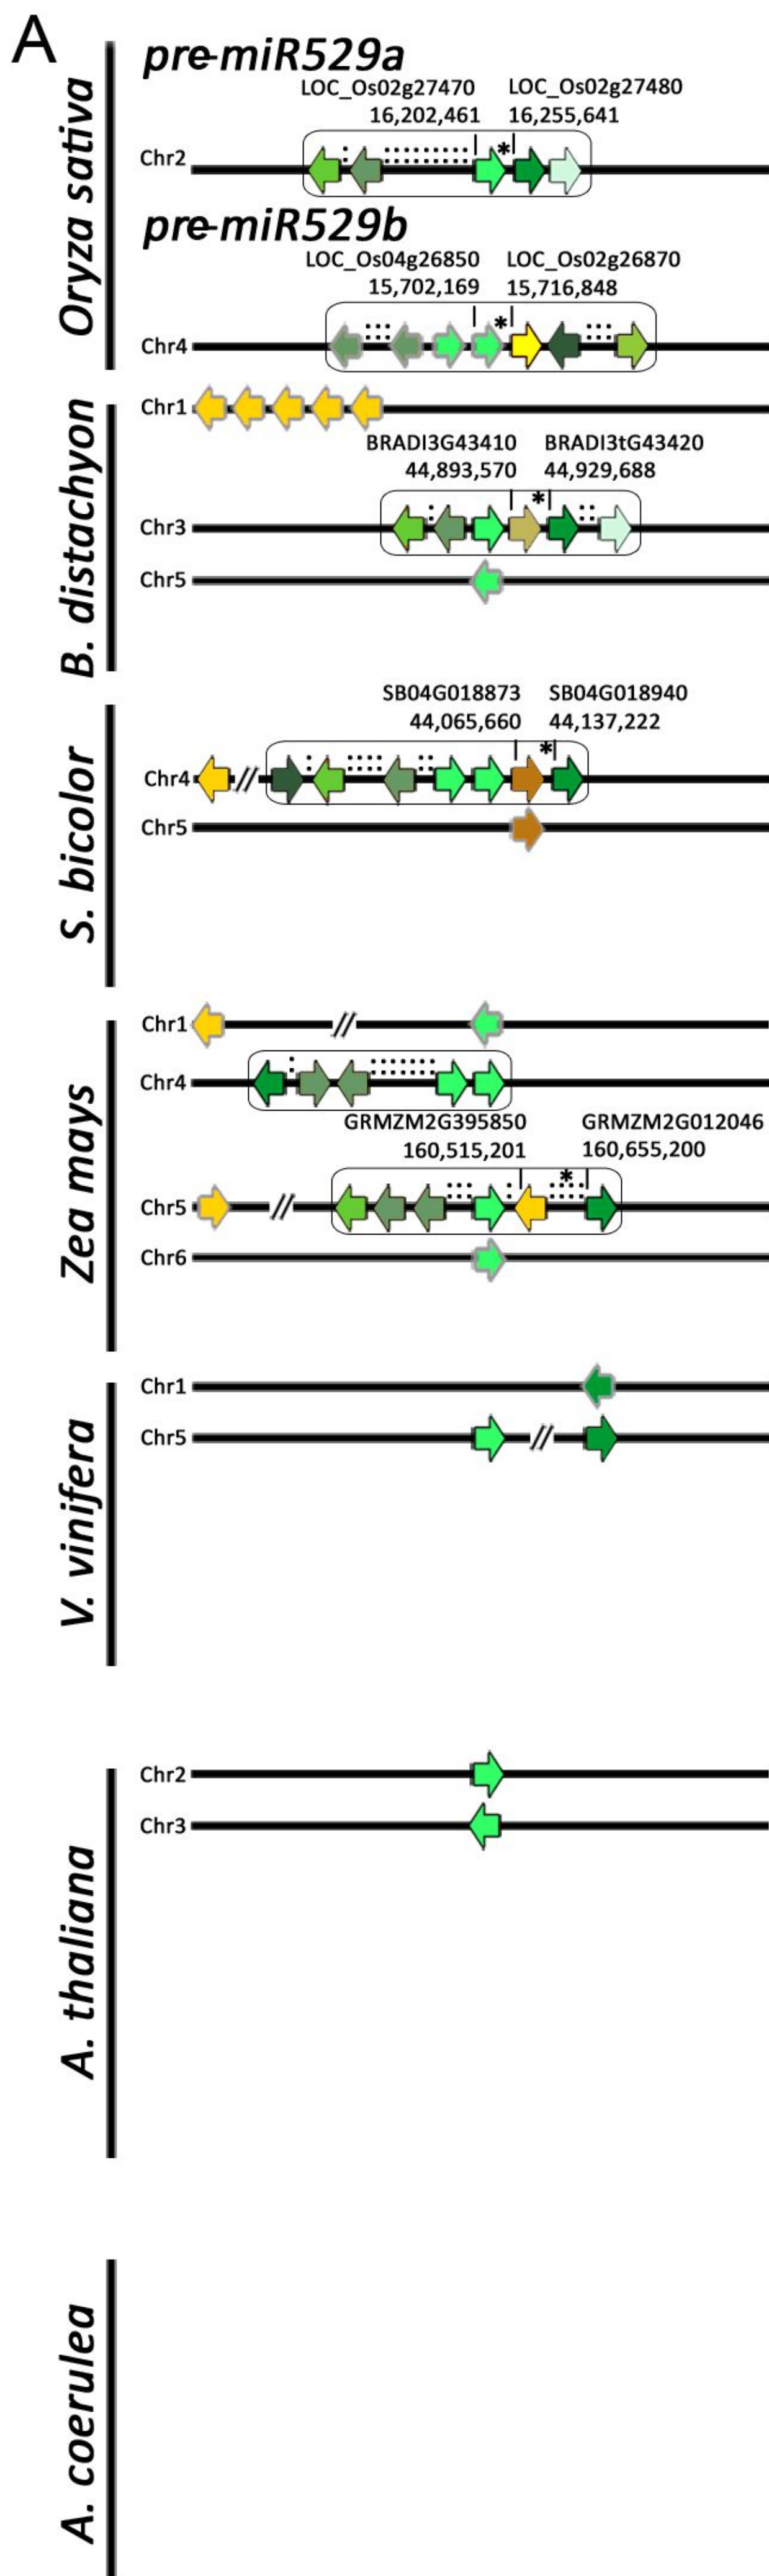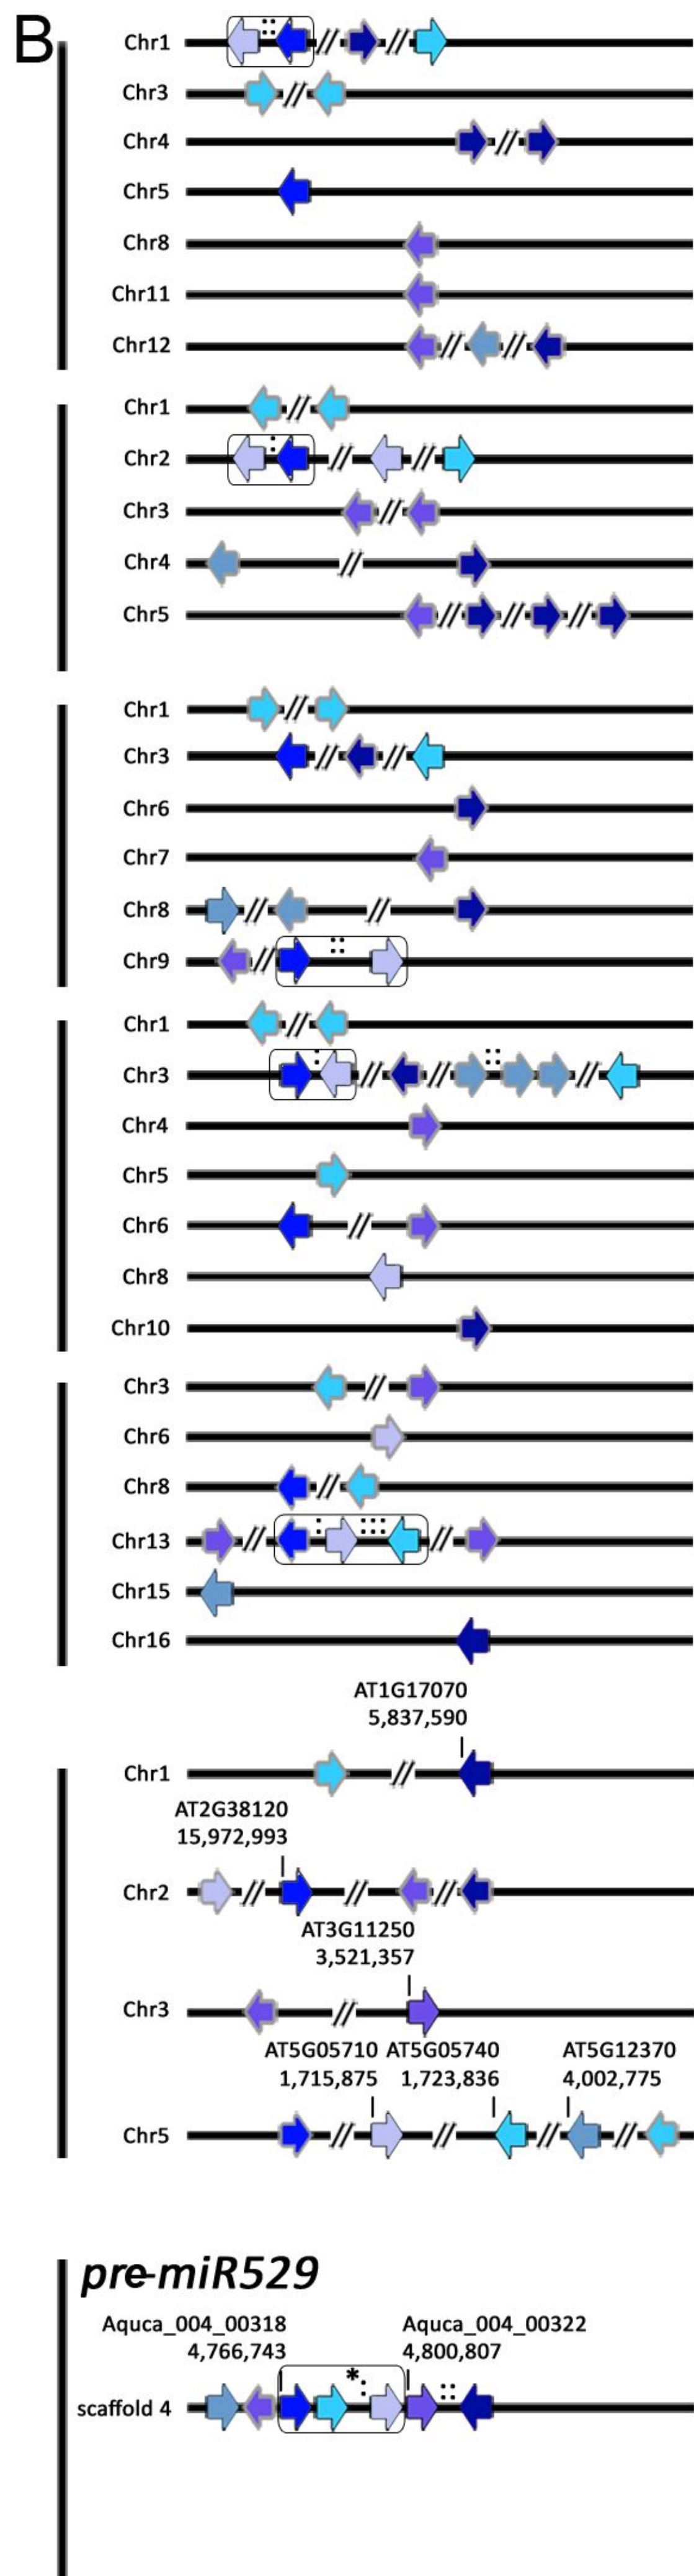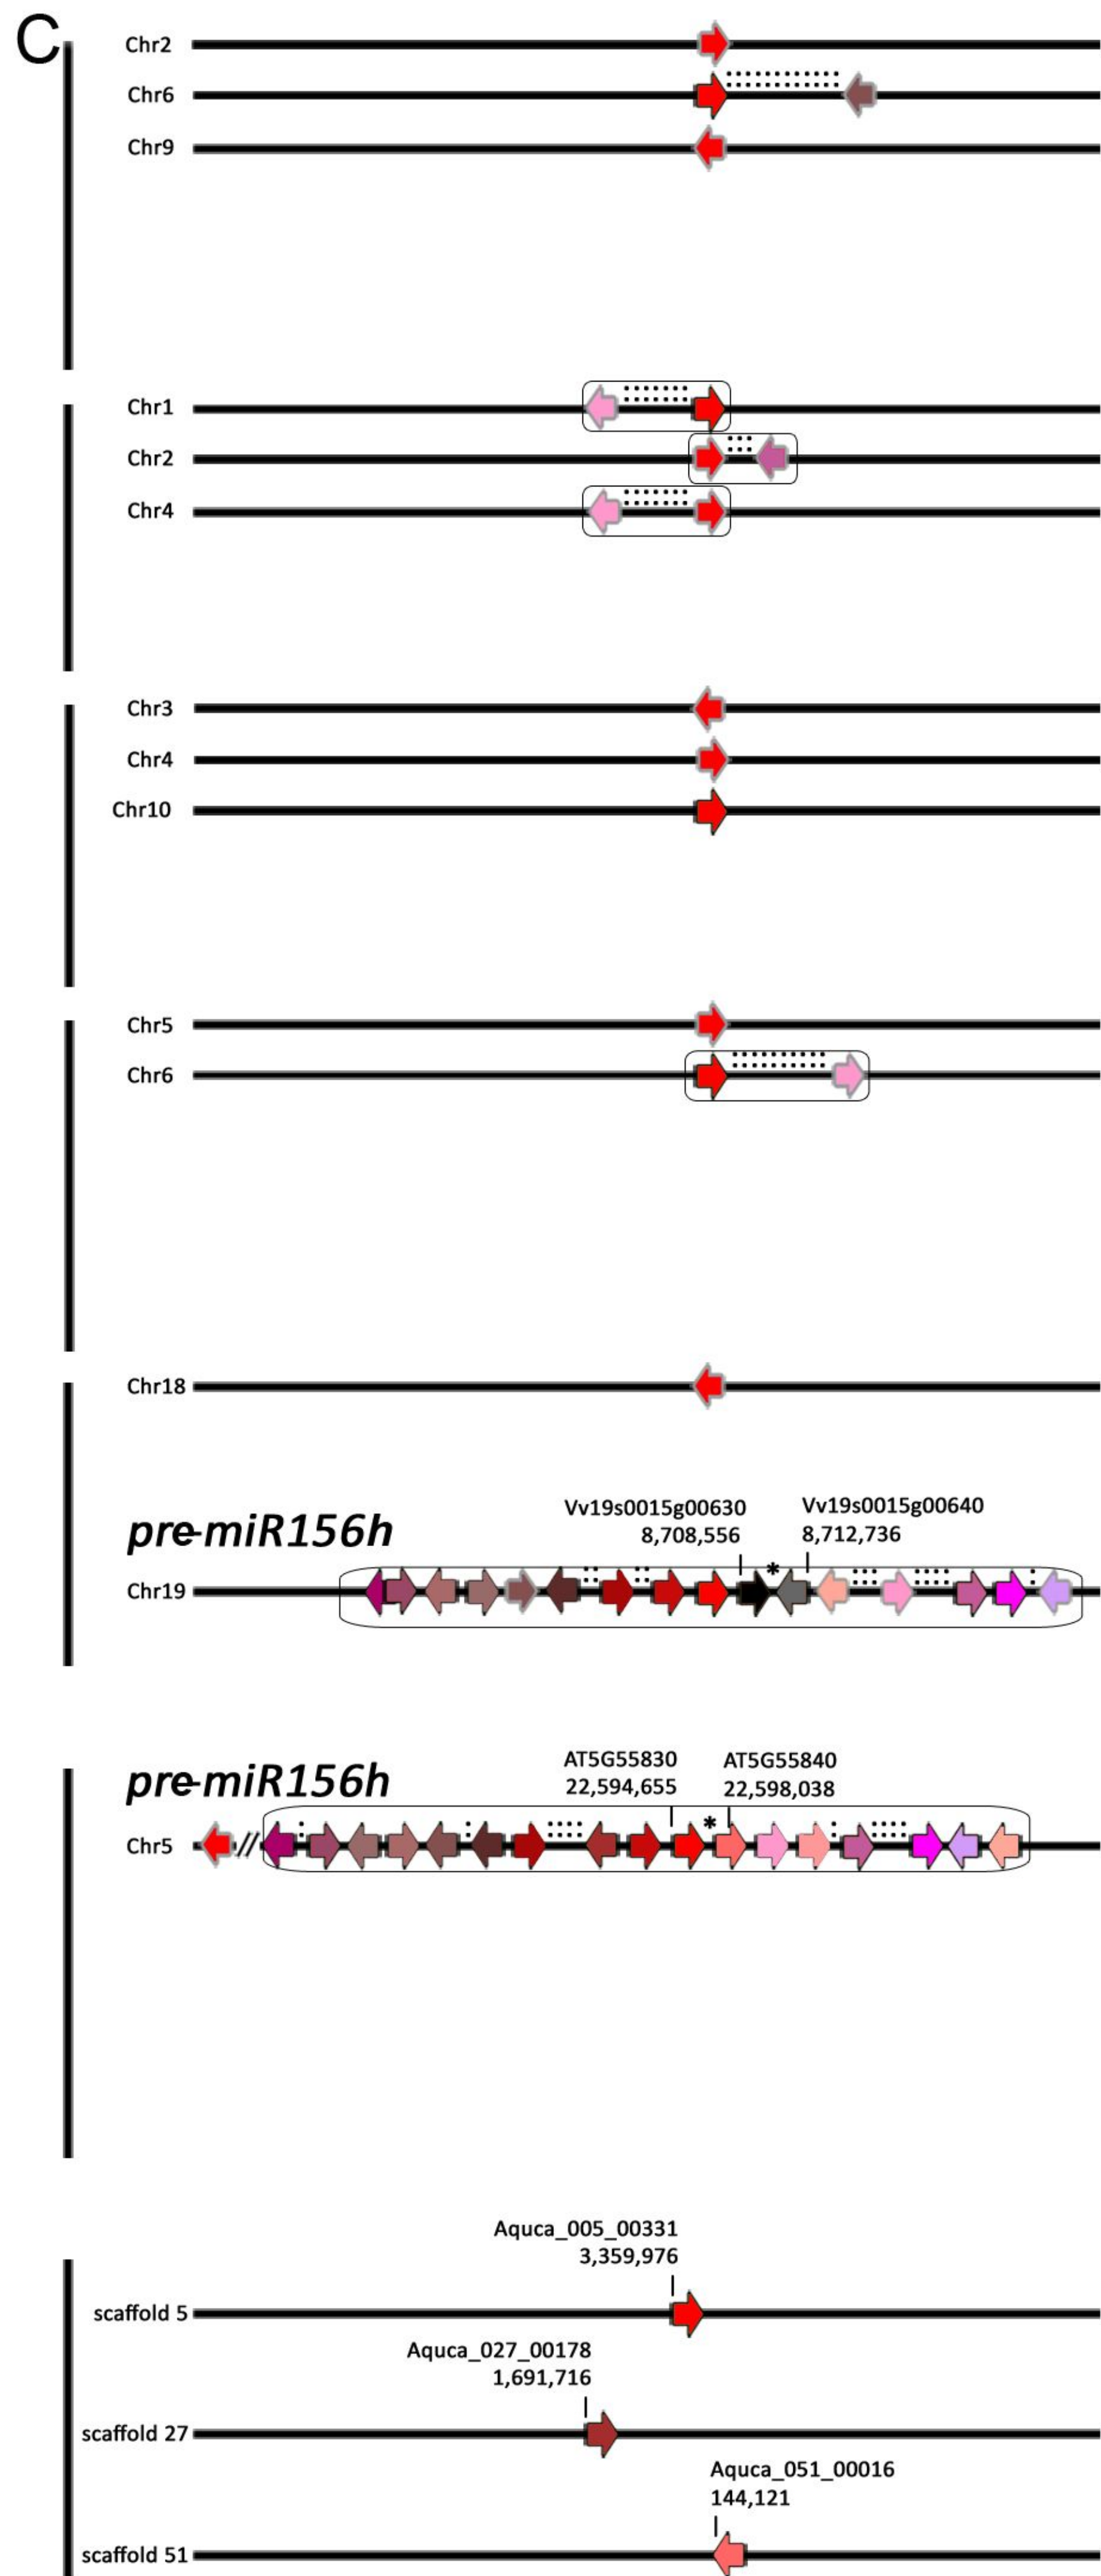

Supplement: 12870_2016_716_MOESM4_ESM.pdf [file 12870_2016_716_MOESM4_ESM.pdf]
