# Supplementary material for: Functional and evolutionary analyses of the miR156 and miR529 families in land plants
Source: PubMed Central journal article supplement (PMC4739381; doi:10.1186/s12870-016-0716-5), 2016-02-03
Supplement: 12870_2016_716_MOESM5_ESM.pdf [file 12870_2016_716_MOESM5_ESM.pdf]

Additional file 5. PARE and RNA-seq data for rice *MIR156* and *MIR529* precursors.

| miRNA precursors | PARE libraries                                          |                                  |                                                  |                                           | Total | RNA-seq library                    | sRNA-seq library                   |
|------------------|---------------------------------------------------------|----------------------------------|--------------------------------------------------|-------------------------------------------|-------|------------------------------------|------------------------------------|
|                  | Three-week-old wild-type seedlings (SC938) <sup>a</sup> | Wild-type young panicle (INF939) | Wild-type young inflorescences (4-6cm; INF9311a) | Three-week-old wild-type seedlings (NPBs) |       | Wild-type leaf tissue <sup>b</sup> | Wild-type leaf tissue <sup>b</sup> |
| <i>MIR156a</i>   | 23                                                      | 49                               | 1                                                | 97                                        | 170   | n.d.                               | <15,000                            |
| <i>MIR156b</i>   | 23                                                      | 49                               | 1                                                | 97                                        | 170   | <10                                | <15,000                            |
| <i>MIR156c</i>   | 23                                                      | 49                               | 1                                                | 103                                       | 176   | <10                                | <15,000                            |
| <i>MIR156d</i>   | 34                                                      | 109                              | 3                                                | 257                                       | 403   | >10                                | >80,000                            |
| <i>MIR156e</i>   | 23                                                      | 49                               | 1                                                | 73                                        | 146   | n.d.                               | <15,000                            |
| <i>MIR156f</i>   | 31                                                      | 126                              | 24                                               | 197                                       | 378   | >10                                | >80,000                            |
| <i>MIR156g</i>   | 23                                                      | 49                               | 7                                                | 113                                       | 192   | >10                                | <15,000                            |
| <i>MIR156h</i>   | 37                                                      | 120                              | 4                                                | 199                                       | 360   | >10                                | >80,000                            |
| <i>MIR156i</i>   | 23                                                      | 49                               | 1                                                | 78                                        | 151   | n.d.                               | <15,000                            |
| <i>MIR156k</i>   | 0                                                       | 3                                | 1                                                | 4                                         | 8     | n.d.                               | <100                               |
| <i>MIR156l</i>   | 0                                                       | 0                                | 3                                                | 14                                        | 17    | n.d.                               | <100                               |
| <i>MIR529a</i>   | 0                                                       | 0                                | 69                                               | 40                                        | 109   | n.d.                               | <15,000                            |
| <i>MIR529b</i>   | 0                                                       | 0                                | 0                                                | 10                                        | 10    | n.d.                               | <100                               |

<sup>a</sup>Sequence abundance for all PARE samples was normalized to TP10M (transcript per 10 million reads). Data were retrieved from publicly available database ([https://mpss.udel.edu/dbs/index.php?SITE=rice\\_pare](https://mpss.udel.edu/dbs/index.php?SITE=rice_pare)).

<sup>b</sup>Sequence abundance from RNA-seq and sRNA-seq libraries was normalized to TP10M. Data were retrieved from Stroud et al. (2013). N.d, not detected.

Reference:

Stroud H, Ding B, Simon SA, Feng S, Bellizzi M, Pellegrini M, Wang GL, Meyers BC, Jacobsen SE. 2013. Plants regenerated from tissue culture contain stable epigenome changes in rice. *Elife*. 2:e00354.
