# Supplementary material for: Functional and evolutionary analyses of the miR156 and miR529 families in land plants
Source: PubMed Central journal article supplement (PMC4739381; doi:10.1186/s12870-016-0716-5), 2016-02-03
Supplement: 12870_2016_716_MOESM6_ESM.pdf [file 12870_2016_716_MOESM6_ESM.pdf]

**Additional file 6. Oligonucleotide sequences used in this work.**

| Oligonucleotide | Gene                      | Sequence                          | Use    |
|-----------------|---------------------------|-----------------------------------|--------|
| AtSPL9-F        | <i>AtSPL9</i>             | GGTCGGGTCAGTCGGGTCAGATAACC        | RT-PCR |
| AtSPL9-R        | <i>AtSPL9</i>             | ACTGGCCGCCTCATCACTCTTGTATCC       | RT-PCR |
| AtSPL15-F       | <i>AtSPL15</i>            | AGAAGCAAGAACCGGGTCAATACC          | RT-PCR |
| AtSPL15-RNested | <i>AtSPL15</i>            | AGCCATTGTAACCTTATCGGAGAATGAG      | RT-PCR |
| AtSPL15- R      | <i>AtSPL15</i>            | TCATCGAGTCGAAACCAGAAGAT           | RT-PCR |
| AtSPL13-F       | <i>AtSPL13</i>            | CCAATCTCTTCTTCTCCAAACAGTACCAGAAGC | RT-PCR |
| AtSPL13-R       | <i>AtSPL13</i>            | GAAGCAAATGAGGGACTGACGACG          | RT-PCR |
| AtSPL10-F       | <i>AtSPL10</i>            | GTGGGAGAATGCTCAGGAGGC             | RT-PCR |
| AtSPL10-R       | <i>AtSPL10</i>            | GAGTGTGTTTGTATCCCTTGTGAATCC       | RT-PCR |
| AtSPL6-F        | <i>AtSPL6</i>             | CTTGAGCTACGGGAGAAGC               | RT-PCR |
| AtSPL6-R        | <i>AtSPL6</i>             | TCCATTGGAGTTACCAGCCA              | RT-PCR |
| AtSPL5-F        | <i>AtSPL5</i>             | ATGCAGCAGGTTTCATGAGC              | RT-PCR |
| AtSPL5-F        | <i>AtSPL5</i>             | GCCTGACCCTTCTCCAAAAC              | RT-PCR |
| AtSPL4-R        | <i>AtSPL4</i>             | CCAAAATGGAGGGTAAGAGA              | RT-PCR |
| AtSPL4-R        | <i>AtSPL4</i>             | GCCTCTTTCATATCAGCTGTGC            | RT-PCR |
| AtSPL3-F        | <i>AtSPL3</i>             | CTTAGCTGGACACAACGAGAGAAGG         | RT-PCR |
| AtSPL3-R        | <i>AtSPL3</i>             | GAGAAACAGACAGAGACACAGAGGA         | RT-PCR |
| AtSPL2-F        | <i>AtSPL2</i>             | CCGACGTCTCTCAGATCACA              | RT-PCR |
| AtSPL2-R        | <i>AtSPL2</i>             | TGGTACGTGCTTCGAACCTTG             | RT-PCR |
| Os529pre-F      | <i>OsMIR529</i> precursor | CTCCCTCTTCTTCTTTAGC               | RT-PCR |

**Additional file 6. Continued**

| <b>Oligonucleotide</b> | <b>Gene</b>                | <b>Sequence</b>                                    | <b>Use</b>   |
|------------------------|----------------------------|----------------------------------------------------|--------------|
| Os529pre-R             | <i>OsMIR529</i> precursor  | GGCTGCATGGACAGATAAGA                               | RT-PCR       |
| AtActina –F            | <i>AtACTIN-2</i>           | GACCTTGCTGGACGTGACCTTAC                            | RT-PCR       |
| AtActina –R            | <i>AtACTIN-2</i>           | GTAGTCAACAGCAACAAAGGAGAGC                          | RT-PCR       |
| OsSPL14 -F             | <i>OsSPL14</i>             | ATCTCCGGTGGTATCCAGTG                               | RT-PCR       |
| OsSPL14 -R             | <i>OsSPL14</i>             | CACGATGGATTGGTCTCTGTA                              | RT-PCR       |
| OsUbiquitina –F        | <i>OsUBIQUITIN</i>         | AGAAGGAGTCCACCCTCCACC                              | RT-PCR       |
| OsUbiquitina -R        | <i>OsUBIQUITIN</i>         | GCATCCAGCACAGTAAAACACG                             | RT-PCR       |
| OsmiR529-F             | OsmiR529b                  | CCTGAGAGAAGAGAGAGAGTA                              | RT-PCR       |
| Stem-loop OsmiR529     | OsmiR529b                  | GTCGTATCCAGTGCAGGGTCCGAGGTATTCGCACTGGATACGACAGGCTG | RT-PCR       |
| AtmiR156-F             | AtmiR156                   | CCTGAGTGACAGAAGAGAGTG                              | RT-PCR       |
| Stem-loop AtmiR156     | AtmiR156                   | GTCGTATCCAGTGCAGGGTCCGAGGTATTCGCACTGGATACGACTGCTCT | RT-PCR       |
| Aqc529pre-F            | <i>AqcMIR529</i> precursor | CACCGGATCCAGAGATGAGAGATATGTGACAGAAG                | RT-PCR       |
| Aqc529pre-R            | <i>AqcMIR529</i> precursor | GCAGAGCTCAGAGAGAGAGAGATTTGGTGATGA                  | RT-PCR       |
| Reverso universal      |                            | GTGCAGGGTCCGAGG                                    | RT-PCR       |
| OsMIR529b_F            | p35S::OsMIR529b            | CACCGGATCCTAGTACTAAGTTGAGTTCCATCCGA                | Construction |
| OsMIR529b_R            | p35S::OsMIR529b            | GCAGAGCTCCTGTCATTAGTTAAAACACTAGAACATGC             | Construction |
| AqMIR529_F             | p35S::AqcMIR529            | CACCAGAGATGAGAGATATGTTGACAGAAG                     | Construction |
| AqMIR529_R             | p35S::AqcMIR529            | GCAAGAGAGAGAGAGATTTGGTGATGA                        | Construction |
