# Supplementary material for: Functional and evolutionary analyses of the miR156 and miR529 families in land plants
Source: PubMed Central journal article supplement (PMC4739381; doi:10.1186/s12870-016-0716-5), 2016-02-03
Supplement: 12870_2016_716_MOESM7_ESM.pdf [file 12870_2016_716_MOESM7_ESM.pdf]

**Additional file 7. Multiple Sequence Alignment of Selected *SPL* nucleotide sequences.** Multiple sequence alignment was performed using the MUSCLE algorithm (Edgar, 2004).

---

```

OsSPL2      CGGCGTGCTCGGTGGAGGGGTGCGCCGCCGACCTGTCCAAGTGGCTCGACTACCACCGGC
PtSPL1      CCTTTTGCCAGGTCTATGATTGTAACAAGGATCTTAGTTCCCTCCAAGGATTACCACAAGA
PpSPL3      CGCGTTGTCAAGTGCAGGGTTGTGATGCCGACCTGAGCTGTTGCAAAGACTATCACAAC
PpSPL6      CGCGTTGTCAAGTGCAGGGCTGTAAGGCTGATCTAAGTGGTTGCAAAGACTATCACAAGC
PpSPL13     CGCGTTGTCAAGTGGAGGGCTGTAAGGCTGATCTGAGTGGTTGCAAAGATTATCATAAGC
ZmSBP7      CGCGCTGCCGTGGTCGACGGCTGCAACGCGACCTCACCGACGCCAAGACCTACTACTGCC
ZmSBP5      CCCGCTGCCAGGTCGACGGCTGCAACGTTGACCTCACCGACGTCAAGGCCTACTACTGCC
SbSPL5      CGCGCTGCCAGGTCGACGGCTGCAACGTTGACCTCACCGACGTCAAGCCCTACTACTGCC
BdSPL14     CGCGGTGCCAGGTGGAAGGGTGC GAAGTGGATCTCACGGCCTCCAAGGGCTACTACTGCC
OsSPL14     CGCGGTGCCAGGTGGAGGGGTGCGGCGCGGATCTGAGCGGGATCAAGAACTACTACTGCC
BdSPL17     CGAGGTGCCAGGTGGAAGGGTGC GGCGTGGATCTGAGCGGGACAAAGACCTACTACTGCC
ZmSBP1      CGCGGTGCCGGGTGGACGGGTGCGGCGTGGATCTGAGCGCCGTCAAGCAGTACTACTGCC
TSH4       CGAGGTGCCAGGTGGACGGGTGCGGCGTGGATCTGAGCGCCGTCAAGCAGTACTACTGCC
AlSPL      CGAGGTGCCAAGTGGAAAGTTGTAGAAATGGATCTAAGCAATGTAAAAGCTTATTACTCAA
AtSPL15     CGAGGTGCCAAGTGGAAAGTTGTAGAAATGGATCTAAGCAATGTAAAAGCTTATTACTCGA
AtSPL9     CAAGGTGCCAAGTGGAAAGTTGTGGGATGGATCTAACCAATGCAAAAAGTTATTACTCGA
ThSPL      CAAGGTGCCAAGTGGAAAGTTGTGGGATGGATCTAACCAATGCAAAAAGTTATTACTCTA
SlSBP15     CTAGGTGCCAAGTTGAAGGTTGT CAGGCAGATCTGAGTGATGCTAAGGCTTACTATTCTA
MtSPL      CTAGGTGTCAAGTTGAAGGATGTAAACTAGATCTGACTGATGCTAAAGCTTACTATTCTA
MdSPL1     CGCGGTGT CAGGTGGAGGGCTGCGAGGTAGATCTGAGTGGTGCCAAAGCTTACTATTCCA
AmSPL4     CTAGGTGCCAGGTGGAGGGTTGTAAGATAGATCTGAGTGATGCTAAGGCTTATTATTCAA
GmSPL9     CTAGGTGT CAGGTGAGGGCTGCAAAGTAGATCTGAGTGGTGCTAAGGCTTACTATTCTA
PontSPL9   CAAGGTGCCAAGTGGAGGGGTGTAAAGTTGATCTGAGTGATGCCAAAGCTTACTATTCAA
VvSPL9     CGAGGTGTCAAGTTGAAGGGTGTAAAGTAGATCTGAGTGATGCCAAAGCTTACTATTCAA
PtSPL2     CAAGGTGTCAAGTTGAAGGGTGC AAAGTAGATCTGAGTGATGCTAAGACTTACTATTCAA
RcSPL      CTAGGTGTCAAGTTGAAGGGTGTAAAGTTGATCTGAGTGATGCTAAGGCTTACTATTCAA
*      * *      * *      * *      * *      * *      * *      * *      *

```

  

```

OsSPL2      GGCACAAGGTGTGCGAGGCGCACTCCAAGACGGCCGTCGTCACCGTCGCCGGCCAGCAGC
PtSPL1      GGCATAAAGTTTGTGAGGTT CATAACGAAAACCTCCTCAAGTTATTGTTAATGGCAATGAAC
PpSPL3      GTCACAAAGTGTGTGAGATGCACTCCAAAGCGGCCACAGCAATAGCAGCTGGAATTGAGC
PpSPL6      GTCACAAAGTTTGC GAGATGCACTCCAAAGCGCCCAAATGCATTGCAGCTGGGATTGAGC
PpSPL13     GTCACAAAGTGTGTGAGATGCACTCCAAGCGCCCAAATGCATTGCAGCTGGGATTGAGC

```



AtSPL15 AAAGGTTTTGTCAACAATGTAGCAGGTTTCACCAGCTTCTGAGTTTGACTTGGAGAAAA  
 AtSPL9 AGAGGTTTTGTCAACAGTGCAGCAGGTTTCATCAGCTTCCGGAAATTTGACCTAGAGAAAA  
 ThSPL AGAGGTTTTGTCAACAGTGCAGCAGGTTTCATCAGCTTCCGGAGTTTGACCTAGAGAAAA  
 SlSBP15 AGAGGTTTTGCCAACAGTGTAGCAGGTTCCACCAATTAAC TGAATTCGACCAGGGGAAAA  
 MtSPL AAAGGTTTTGTCAACAATGTAGCAGATTCATCAGCTTGCTGAGTTTGATCAAGGAAAAA  
 MdSPL1 AGAGGTTTTGCCAACAGTGTAGCAGGTTTCATTTACTTCCCTGAATTTGATCAAGGAAAAA  
 AmSPL4 AAAGGTTTTGCCAGCAGTGCAGCAGGTTTCATCAATTGCCTGAATTTGACCAAGGAAAAA  
 GmSPL9 AAAGGTTTTGCCAACAGTGTAGCAGGTTTCATCTGCTTTCTGAATTTGATGAAGGAAAAA  
 PontSPL9 AGAGGTTTTGCCAGCAATGTAGCAGATTCATCAGCTTCCGGAGTTTGACCAAGGAAAAA  
 VvSPL9 AGAGGTTTTGCCAGCAGTGTAGCAGATTCATCAGCTTGCCGAATTTGACCAAGGAAAAA  
 PtSPL2 AAAGTTTTGCCAGCAATGTAGCAGATTCATCTACTTCCCTGAATTTGACCAAGGAAAAA  
 RcSPL AAAGTTTTGCCAGCAGTGTAGTAGATTTCACTCAACTTCCCTGAATTTGACCAAGGAAAAA  
 \* \* \* \* \* \* \* \* \* \* \* \* \* \* \* \* \* \* \* \* \* \*

OsSPL2 GGAGCTGCAGGAAGCGGCTCGACGGGCACAACAAGCGGCGTCGGAAGCCGCACCTCGTAC  
 PtSPL1 GCAGTTGTCGTA AACGCCTGGCAGGCCACAATGAACGCAGACGAAAGCCTCGGGACTTCC  
 PpSPL3 GCAGTTGTCGTAGAAGACTAGCAGGTCATAATCAACGGCGACGGAAGTCTCGCATCCTCA  
 PpSPL6 GCAGCTGTGCGCAGGAGATTGGCAGGTCACAATGAACGGCGAAGAAAGCCACGCATCGTCA  
 PpSPL13 GCAGTTGTCGTAGAAGGCTGGCAGGTCACAATGAGCGGCGCAGGAAGCCTCGCATCGTCA  
 ZmSBP7 AAAGCTGTGCGCAAGCGTCTAGCAGGCCACAACGAACGCCGGAGACGGCCACGAAGCTTCA  
 ZmSBP5 AGAGCTGCCGCAAACGCCTCGCAGGCCACAACGAGCGCCGGAGGAGGCCCGCAAGCTTCA  
 SbSPL5 AAAGCTGCCGAGACGCTCTCGCAGGCCACAATGAACGCCGGAGGAGGCCACGAAGCTTTA  
 BdSPL14 GCAGCTGCCGAGACGCCTCGCAGGCCACAATGAGCGCCGAGGAGGCCACGAGGCTATC  
 OsSPL14 GCAGCTGCCGAGACGCCTTG CAGGTCATAATGAGCGCCGGAGGAGGCCCGCAAGCTTTA  
 BdSPL17 GAAGTTGCCGAGGCGCCTAGCGGGTCACAATGAGCGCCGGAGGAAGCCCCGAAGCTTTC  
 ZmSBP1 GAAGCTGCCGCGCCGCCTCATTTGGTCACAACGAGCGCCGGAGGAAGCCACGGAGCTTCC  
 TSH4 GTAGCTGCCGCGCCGCCTCATCGGTCACAACGAGCGCCGGAGGAAGCCACGAAGCTTCC  
 AlSPL GAAGTTGTCGAGACGACTCGCTTGT CATAACGAACGTGCGAAGAAAGCCACAAAGCGTTT  
 AtSPL15 GAAGTTGTCGAGAAAGACTCGCTTGT CATAACGAACGACGAAGAAAACCACAAAGCGTTT  
 AtSPL9 GGAGTTGCCGAGGAGACTCGCTGGTCATAATGAGCGACGAAGGAAGCCACGAAGCTTTC  
 ThSPL GAAGTTGCCGTAGGAGACTCGCTGGCCATAATGAGCGTCGGAGAAAGCCACGGAGCTTTC  
 SlSBP15 GGAGTTGCCGAGGAGACTGGCATGCCATAATGAGCGTCGTAGGAAGCCTCGAAGCTTTC  
 MtSPL GAAGTTGTCGGAGACGACTAGCTGGTCATAATGAGCGTCGCAGAAAAGCCCCGAGCTTTT  
 MdSPL1 GTAGTTGTCGTAGACGCTTGGCTGGGCATAATGAGCGTCGTAGAAAACCACGAAGCTTTC  
 AmSPL4 GAAGTTGCCGAGACGCCTTGCTGGCCACAATGAGCGTCGGAGGAAGCCGCGAGGCTTCG  
 GmSPL9 GAAGCTGCCGAGGCGACTTGCTGGTCATAATGAGCGCCGACGAAAGCCCCGTGGCTTTC  
 PontSPL9 GAAGTTGCCGAGGCGCCTGGCAGGCCATAATGAGCGCCGGAGGAAGCCAAGAGGATTTTC

VvSPL9 GAAGTTGTCGTAGGCGCCTGGCTGGTCATAATGAGCGTCGCAGGAAGCCACGAGGCTTTC  
 PtSPL2 GAAGTTGCCGACGGCGCCTAGCTGGCCATAATGAGCGACGGAGGAAGCCACGAGGCTTTC  
 RcSPL GAAGTTGTCGCAGACGCCTAGCAGGTATAATGAGCGACGGAGGAAGCCACGAGGCTTTC  
 \*\* \*\* \* \* \* \* \* \* \* \* \* \* \* \* \*

OsSPL2 CAACTGTGCTCTCTCTTTCTGTCACTTTCTCATCGT  
 PtSPL1 TAGCTGTGCTCTCTCTTTCTGTCAACTACTCTCTTT  
 PpSPL3 CGGCCGTGCTCTCTCTTTCTGTCAAACAATCAATCT  
 PpSPL6 TGGTCGTGCTCTCTCTTTCTGTCAAACAATCGATCT  
 PpSPL13 TGGCCGTGCTCTCTCTTTCTGTCAAACAATCGACCT  
 ZmSBP7 TAGCTGTGCTCTCTCTTTCTGTCAAGTGGTCGCTCT  
 ZmSBP5 TAGCTGTGCTCTCTCTTTCTGTCAACTGGTCGCTCT  
 SbSPL5 TAGCTGTGCTCTCTCTTTCTGTCAACTGGTCACTCT  
 BdSPL14 TAGCTGTGCTCTCTCTTTCTGTCAACTGGTCTCAGT  
 OsSPL14 CAGCTGTGCTCTCTCTTTCTGTCAAATGGTCTCTGT  
 BdSPL17 TAGCTGTGCTCTCTCTTTCTGTCAACTGGTCTCTGT  
 ZmSBP1 TAGCTGTGCTCTCTCTTTCTGTCAAATGGTCCCTGT  
 TSH4 TAGCTGTGCTCTCTCTTTCTGTCAACTGGTCCCTGT  
 ALSPL TAGCTGTGCTCTCTCTTTCTGTCAAATGGTCTCTTT  
 AtSPL15 TAGCTGTGCTCTCTCTTTCTGTCAAATGGTCTCTTT  
 AtSPL9 TAACTGTGCTCTCTCTTTCTGTCAACTGGTCTCTCT  
 ThSPL TAACTGTGCTCTCTCTTTCTGTCAACTGGTCTCTCT  
 SlSBP15 TAGTGGTGTCTCTCTTTCTGTCAACTGGACTCTTT  
 MtSPL TAACTGTGCTCTCTCTTTCTGTCAAGTGGTCACTGT  
 MdSPL1 TAGCTGTGCTCTCTCTTTCTGTCAACTGGTCACTTT  
 AmSPL4 TAGCGGTGCTCTCTCTTTCTGTCAACTGGTCCCTAT  
 GmSPL9 TAACTGTGCTCTCTCTTTCTGTCAACTGGTCTCTTT  
 PontSPL9 TAACTGTGCTCTCTCTTTCTGTCAAATGGTCCCTTT  
 VvSPL9 TAGCTGTGCTCTCTCTTTCTGTCAACTGGTCACTTT  
 PtSPL2 TAGCTGTGCTCTCTCTTTCTGTCAACTGGTCACTTT  
 RcSPL TTCCTGTGCTCTCTCTTTCTGTCAACTGGTCGCTTT  
 \*\*\*\*\* \*
